# Supplementary material for: Mitochondrial DNA mutations and respiratory chain dysfunction in idiopathic and connective tissue disease-related lung fibrosis
Source: PubMed Central journal article supplement (PMC6445113; doi:10.1038/s41598-019-41933-4), 2019-04-02

## **Mitochondrial DNA mutations and respiratory chain dysfunction in idiopathic and connective tissue disease-related lung fibrosis**

Veronika K. Jaeger<sup>1</sup>, Dirk Lebrecht<sup>2,3</sup>, Andrew G. Nicholson<sup>4,5</sup>, Athol Wells<sup>5,6</sup>, Harshil Bhayani<sup>7</sup>, Amiq Gazdhar<sup>8</sup>, Michael Tamm<sup>9</sup>, Nils Venhoff<sup>2</sup>, Thomas Geiser<sup>8</sup>, and Ulrich A. Walker<sup>1\*</sup>

<sup>1</sup> Department of Rheumatology, University Hospital Basel, Basel, Switzerland

<sup>2</sup> Department of Rheumatology and Clinical Immunology, Medical Center - University of Freiburg, Faculty of Medicine, University of Freiburg, Freiburg, Germany

<sup>3</sup> Department of Pediatrics and Adolescent Medicine, Division of Pediatric Hematology and Oncology, Medical Center, Faculty of Medicine, University of Freiburg, Freiburg, Germany

<sup>4</sup> Department of Histopathology, Royal Brompton Hospital, Royal Brompton and Harefield NHS Foundation Trust; London, UK

<sup>5</sup> National Heart and Lung Institute, Imperial College, London, UK

<sup>6</sup> Interstitial Lung Disease Unit, Royal Brompton Hospital, Royal Brompton and Harefield NHS Foundation Trust, London, UK

<sup>7</sup> Royal Brompton and Harefield NHS Foundation Trust; London, UK

<sup>8</sup> Department of Pulmonary Medicine, University Hospital Bern, Bern Switzerland

<sup>9</sup> Department of Pneumology, University Hospital Basel, Basel, Switzerland

**Supplementary figure 1:** Representative image of an agarose gel detecting the common mtDNA deletion. Lane 1: 100bp DNA ladder as a size marker (Sigma). Lane 2: Negative control plasmid without mtDNA insert. Lane 3: Healthy control DNA. Lanes 4-6: Detection of common deletions in DNA from patients with interstitial lung disease in different lung areas (lower lobe, upper lobe, and upper lobe, respectively). Lane 7: Positive control (plasmid containing the common mtDNA deletion).

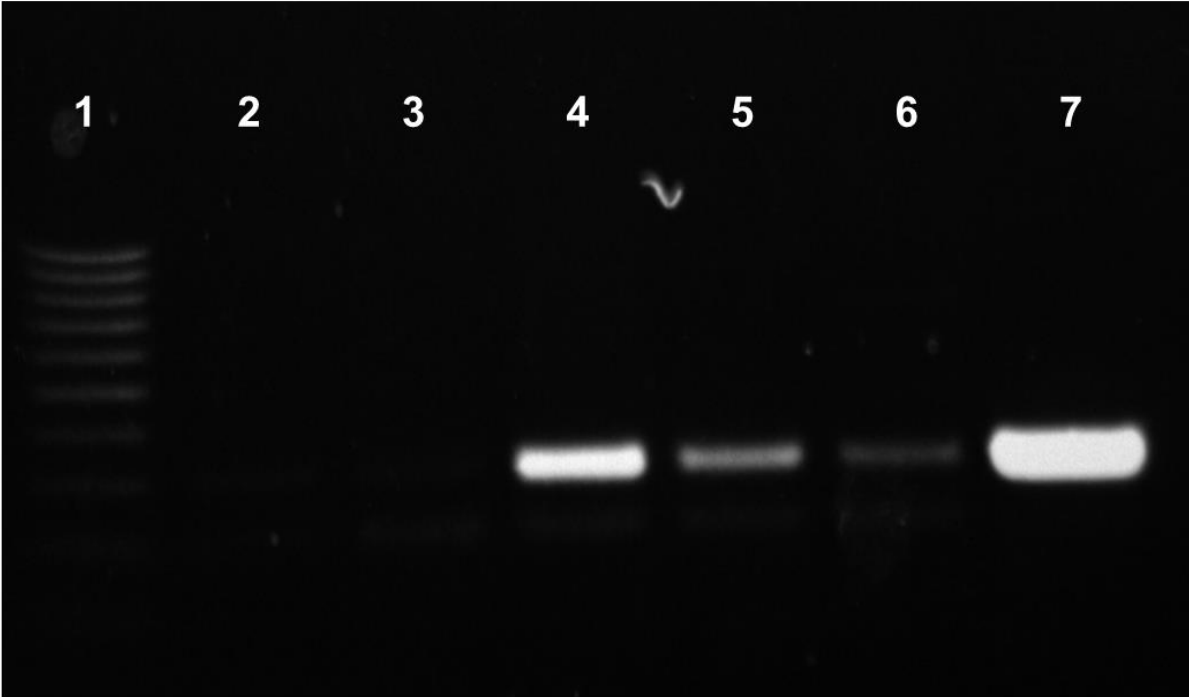

Supplement: 41598_2019_41933_MOESM1_ESM.pdf [file 41598_2019_41933_MOESM1_ESM.pdf]
